# Supplementary material for: Simultaneous Determination of Procainamide and N-acetylprocainamide in Rat Plasma by Ultra-High-Pressure Liquid Chromatography Coupled with a Diode Array Detector and Its Application to a Pharmacokinetic Study in Rats
Source: PubMed Central journal article supplement (PMC6027534; doi:10.3390/pharmaceutics10020041), 2018-03-30
Supplement: pharmaceutics-10-00041-s001.pdf [file pharmaceutics-10-00041-s001.pdf]

# Supplementary Materials: Simultaneous Determination of Procainamide and *N*-acetylprocainamide in Rat Plasma by Ultra-High-Pressure Liquid Chromatography Coupled with a Diode Array Detector and Its Application to a Pharmacokinetic Study in Rats

Anusha Balla, Kwan Hyung Cho, Yu Chul Kim and Han-Joo Maeng

**Table 1.** Summary of HPLC bioanalytical method for simultaneous determination of procainamide and *N*-acetylprocainamide in the previous literatures.

| Sample preparation<br>(extraction solvent)                      | Sample<br>source           | Required<br>sample<br>volume (μL) | Required<br>injection<br>volume (μL) | LLOQ<br>(ng/mL) |      | Linear<br>range<br>(ng/mL)           | Refs |
|-----------------------------------------------------------------|----------------------------|-----------------------------------|--------------------------------------|-----------------|------|--------------------------------------|------|
|                                                                 |                            |                                   |                                      | PA              | NAPA |                                      |      |
| LLE (methylene chloride)                                        | Human plasma               | 2000                              | 100                                  | 100             | 100  | 100–800                              | [16] |
| LLE (10% n-propanol in chloroform)                              | Human plasma               | 500                               | 100                                  | 1000            | 1000 | 1000–15,000                          | [17] |
| LLE (methylene chloride and 2-propyl alcohol)                   | Human serum and urine      | 100                               | 50                                   | 50              | 50   | 78.1–10,000                          | [18] |
| LLE (ethylacetate) Deproteinization (ACN)                       | Human, dog, and rat plasma | 100                               | 50                                   | 50              | 50   | 50–10,000                            | [19] |
| LLE (methylene chloride)                                        | Human plasma               | 500                               | 45                                   | 4               | 4    | 4–100 (low)<br>200–2500 (high)       | [20] |
| LLE (chloroform)                                                | Human serum                | 100                               | 20                                   | 2500            | 2500 | 2500–15,000                          | [21] |
| LLE (methylene chloride)                                        | Human blood                | 500                               | 100                                  | 100             | 250  | NA                                   | [22] |
| LLE (methylene chloride)                                        | Human plasma               | 500                               | 10                                   | 500             | 500  | 500–15,000                           | [23] |
| LLE (methylene chloride)                                        | Human plasma               | 200                               | 25                                   | NA              | NA   | NA                                   | [24] |
| LLE (20% 1-butanol, 20% chloroform, and 60% hexane)             | Human plasma               | 100                               | 200                                  | 2000            | 2000 | 2000–20,000                          | [25] |
| LLE (49% methylene chloride, 49% hexane and 2% isoamyl alcohol) | Human plasma               | 2500                              | 75                                   | 220             | 110  | 220–14,000 (PA)<br>110–14,000 (NAPA) | [26] |

LLE: liquid-liquid extraction; PA: procainamide; NAPA: *N*-acetylprocainamide; LLOQ: lower limit of quantification; NA: not available.
